# Supplementary material
Source: Research Square preprint supplement (doi:10.21203/rs.3.rs-8794547/v1)
Supplement: Supplementary file 1 [file 2462e12ecf8d772301f7e22a.docx]

| **Compound** | **Hepato-**  **toxicity** | **AMES Toxicity** | **hERG inhibition** | **CYP2D6 inhibition** | **CYP3A4 inhibition** | **Pains** | **Brenk (Type)** | **ProTox class** | **Final decision** |
| --- | --- | --- | --- | --- | --- | --- | --- | --- | --- |
| trans-3-Indoleacrylic acid | No | No | No | No | No | 0 | 1 (Michael acceptor) | V | **Accept** |
| (R)-Prunasin | No | No | No | No | No | 0 | 0 | IV | **Accept** |
| 4-(Methoxymethyl)-6-methyl-5-nitro-2-[(3,4,5-trimethoxybenzyl) amino] nicotinonitrile | Yes | No | No | No | Yes | 0 | 2 | IV | Reject |
| 1-{4-[3-(2-Methyl-2-propanyl)-1,2,4-oxadiazol-5-yl]-2-pyridinyl}-1H-imidazole-4-carboxylic acid | Yes | No | No | No | No | 0 | 0 | IV | Reject |
| (2E)-3-{3-[(2-Hydroxyethyl)(methyl)sulfamoyl]-4,5dimethoxyphenyl}acrylic acid | Yes | No | No | No | No | 0 | 1 | IV | Reject |
| Pestalotiopyrone L | Yes | No | No | No | No | 0 | 1 | IV | Reject |
| 1-phenylpropane-1_2-dione | No | No | No | No | No | 1 | 1 | IV | Reject |
| pyridoxal isonicotinoyl hydrazone | Yes | No | No | No | No | 0 | 1 | V | Reject |
| (S)-4-Hydroxymandelonitrile | No | No | No | No | Yes | 0 | 1 (Brenk alert) | IV | Reject |
| Adenosine | No | Yes | No | No | No | 0 | 0 | II | Reject |
| 4-methylthiobutanaldoxime | No | No | No | No | No | 0 | 3 | IV | Reject |
| (9S_10S)-9_10-Dihydroxyoctadecanoate | No | No | No | Yes | No | 0 | 0 | V | Reject |
| 5-(4-Morpholinyl)pyrazolo[1,5-a]quinazoline-3-carbonitrile | No | No | No | No | No | 0 | 0 | IV | **Accept** |
| 5-[4-(Allyloxy)-3-methoxyphenyl]-2-amino-5,8-dihydropyrido[2,3-d]pyrimidine-4,7(1H,6H)-dione | Yes | No | No | No | No | 0 | 1 (isolated) | IV | Reject |

Supplementary Table S1: ADMET based screening of compounds identified from HRMS analysis of Moringa oleifera see
